# Supplementary material
Source: PubMed Central journal article supplement (PMC7255928)
Supplement: NIHMS1551761-supplement-_3.pdf [file NIHMS1551761-supplement-_3.pdf]

Table, Supplemental Digital Content 3. Primary and secondary outcomes by study arm and assessment time

|                                                                      | n   | Randomized Participants |                   |                      |            |
|----------------------------------------------------------------------|-----|-------------------------|-------------------|----------------------|------------|
|                                                                      |     | VLPS                    | External Fixation | Percutaneous Pinning | Casting    |
| <b>Overall MHQ Score, injured hand, mean (95% CI)<sup>a</sup></b>    |     |                         |                   |                      |            |
| 6 weeks                                                              | 273 | 54 (49-59)              | 36 (31-41)        | 45 (39-50)           | 47 (44-51) |
| 3 months                                                             | 254 | 72 (66-77)              | 61 (55-67)        | 68 (63-74)           | 68 (65-72) |
| 6 months                                                             | 226 | 80 (74-85)              | 73 (67-78)        | 76 (70-81)           | 76 (72-89) |
| 12 months                                                            | 203 | 83 (78-88)              | 81 (76-86)        | 84 (80-89)           | 82 (77-87) |
| <b>MHQ Pain Score, injured hand, mean (95% CI)<sup>b</sup></b>       |     |                         |                   |                      |            |
| enrollment                                                           | 293 | 70 (63-76)              | 63 (57-70)        | 62 (55-69)           | 56 (51-60) |
| 2 weeks                                                              | 268 | 56 (50-62)              | 54 (48-60)        | 55 (48-62)           | 48 (44-52) |
| 6 weeks                                                              | 273 | 44 (37-50)              | 53 (47-59)        | 48 (40-55)           | 42 (37-46) |
| 3 months                                                             | 254 | 29 (23-35)              | 37 (30-44)        | 31 (24-37)           | 30 (26-34) |
| 6 months                                                             | 226 | 22 (15-28)              | 24 (18-30)        | 25 (18-32)           | 22 (18-26) |
| 12 months                                                            | 203 | 20 (14-27)              | 21 (15-27)        | 20 (13-26)           | 16 (11-21) |
| <b>MHQ Function Score, injured hand, mean (95% CI)</b>               |     |                         |                   |                      |            |
| 6 weeks                                                              | 273 | 53 (48-58)              | 34 (28-39)        | 40 (34-47)           | 43 (39-47) |
| 3 months                                                             | 254 | 67 (62-72)              | 55 (48-61)        | 62 (56-68)           | 64 (61-68) |
| 6 months                                                             | 233 | 78 (73-84)              | 70 (65-75)        | 67 (61-74)           | 70 (66-74) |
| 12 months                                                            | 203 | 79 (73-85)              | 77 (72-82)        | 78 (72-84)           | 76 (70-82) |
| <b>MHQ Activities of Daily Living Score, injured hand, mean (SD)</b> |     |                         |                   |                      |            |
| 6 weeks                                                              | 273 | 48 (41-55)              | 24 (18-30)        | 30 (22-37)           | 32 (28-37) |
| 3 months                                                             | 254 | 75 (69-81)              | 63 (57-70)        | 68 (60-75)           | 71 (66-75) |
| 6 months                                                             | 233 | 86 (80-91)              | 77 (70-83)        | 79 (73-85)           | 81 (77-86) |
| 12 months                                                            | 203 | 84 (79-90)              | 83 (77-88)        | 88 (84-92)           | 85 (79-91) |
| <b>MHQ Work Score, mean (95% CI)<sup>c</sup></b>                     |     |                         |                   |                      |            |
| 6 weeks                                                              | 273 | 46 (39-52)              | 28 (21-35)        | 40 (32-49)           | 38 (33-43) |
| 3 months                                                             | 254 | 71 (64-77)              | 55 (46-63)        | 65 (57-72)           | 61 (56-67) |
| 6 months                                                             | 232 | 81 (74-88)              | 73 (65-81)        | 75 (67-82)           | 77 (72-82) |
| 12 months                                                            | 203 | 79 (72-87)              | 82 (75-89)        | 84 (77-90)           | 83 (77-88) |
| <b>MHQ Aesthetics Score, injured hand, mean (95% CI)</b>             |     |                         |                   |                      |            |
| 6 weeks                                                              | 273 | 68 (61-74)              | 51 (44-59)        | 65 (58-72)           | 70 (65-74) |
| 3 months                                                             | 254 | 82 (76-87)              | 74 (67-81)        | 83 (78-88)           | 78 (74-82) |
| 6 months                                                             | 233 | 82 (77-88)              | 74 (66-81)        | 86 (81-92)           | 82 (78-87) |
| 12 months                                                            | 203 | 86 (81-91)              | 83 (77-89)        | 85 (78-92)           | 83 (78-89) |

eTable 3. Primary and secondary outcomes by study arm and assessment time (continued)

|                                                                                          | n   | Randomized Participants |                   |                      |                |
|------------------------------------------------------------------------------------------|-----|-------------------------|-------------------|----------------------|----------------|
|                                                                                          |     | VLPS                    | External Fixation | Percutaneous Pinning | Casting        |
| <b>MHQ Satisfaction Score, injured hand, mean (95% CI)</b>                               |     |                         |                   |                      |                |
| 6 weeks                                                                                  | 273 | 54 (47-61)              | 30 (24-36)        | 40 (33-48)           | 43 (38-48)     |
| 3 months                                                                                 | 254 | 65 (58-73)              | 55 (47-63)        | 64 (56-72)           | 65 (60-70)     |
| 6 months                                                                                 | 233 | 75 (68-83)              | 67 (59-75)        | 69 (61-78)           | 72 (67-77)     |
| 12 months                                                                                | 203 | 79 (72-87)              | 76 (69-83)        | 80 (73-88)           | 78 (71-85)     |
| <b>SF-36 Physical Component Score, mean (95% CI)<sup>e</sup></b>                         |     |                         |                   |                      |                |
| enrollment                                                                               | 292 | 34 (31-36)              | 33 (30-35)        | 36 (33-39)           | 35 (33-37)     |
| 2 weeks                                                                                  | 268 | 36 (34-38)              | 33 (31-35)        | 35 (33-38)           | 37 (35-39)     |
| 6 weeks                                                                                  | 268 | 41 (39-43)              | 36 (34-38)        | 40 (37-43)           | 39 (37-41)     |
| 3 months                                                                                 | 252 | 45 (42-47)              | 44 (42-46)        | 46 (43-49)           | 44 (42-46)     |
| 6 months                                                                                 | 231 | 48 (45-51)              | 45 (42-48)        | 47 (44-50)           | 45 (43-48)     |
| 12 months                                                                                | 202 | 46 (43-49)              | 46 (43-49)        | 48 (44-51)           | 47 (44-50)     |
| <b>SF-36 Mental Component Score, mean (95% CI)</b>                                       |     |                         |                   |                      |                |
| enrollment                                                                               | 292 | 48 (45-52)              | 50 (46-53)        | 51 (48-55)           | 49 (47-52)     |
| 2 weeks                                                                                  | 268 | 48 (44-51)              | 49 (45-52)        | 50 (45-54)           | 49 (45-54)     |
| 6 weeks                                                                                  | 269 | 52 (49-55)              | 48 (44-52)        | 51 (47-54)           | 52 (49-55)     |
| 3 months                                                                                 | 252 | 55 (52-58)              | 52 (48-55)        | 55 (52-58)           | 55 (66-77)     |
| 6 months                                                                                 | 231 | 55 (52-57)              | 52 (48-55)        | 55 (53-58)           | 56 (54-58)     |
| 12 months                                                                                | 202 | 54 (51-56)              | 53 (50-57)        | 55 (53-58)           | 57 (55-59)     |
| <b>Grip strength, injured hand as a percentage of uninjured hand, mean (95% CI)</b>      |     |                         |                   |                      |                |
| 6 weeks                                                                                  | 214 | 34% (28%-40%)           | 18% (11%-26%)     | 22% (15%-28%)        | 21% (16%-26%)  |
| 3 months                                                                                 | 246 | 55% (49%-60%)           | 42% (35%-50%)     | 41% (35%-48%)        | 41% (36%-45%)  |
| 6 months                                                                                 | 217 | 74% (68%-79%)           | 64% (57%-72%)     | 69% (63%-74%)        | 58% (52%-64%)  |
| 12 months                                                                                | 186 | 84% (79%-90%)           | 73% (65%-80%)     | 82% (77%-86%)        | 80% (74%-85%)  |
| <b>Key pinch strength, injured hand as a percentage of uninjured hand, mean (95% CI)</b> |     |                         |                   |                      |                |
| 6 weeks                                                                                  | 217 | 61% (55%-66%)           | 36% (27%-46%)     | 40% (32%-49%)        | 46% (40%-52%)  |
| 3 months                                                                                 | 244 | 78% (73%-82%)           | 64% (57%-71%)     | 67% (61%-74%)        | 66% (61%-72%)  |
| 6 months                                                                                 | 217 | 101% (81%-120%)         | 82% (77%-88%)     | 81% (75%-87%)        | 90% (73%-107%) |
| 12 months                                                                                | 188 | 93% (87%-98%)           | 86% (82%-91%)     | 91% (86%-95%)        | 86% (82%-90%)  |

**eTable 3. Primary and secondary outcomes by study arm and assessment time (continued)**

|                                                                                          | n   | Randomized Participants |                   |                      |                  |
|------------------------------------------------------------------------------------------|-----|-------------------------|-------------------|----------------------|------------------|
|                                                                                          |     | VLPS                    | External Fixation | Percutaneous Pinning | Casting          |
| <b>Flexion, injured wrist as a percentage of uninjured wrist, mean (95% CI)</b>          |     |                         |                   |                      |                  |
| 6 weeks                                                                                  | 218 | 56% (49%-63%)           | 39% (29%-49%)     | 45% (37%-53%)        | 52% (47%-58%)    |
| 3 months                                                                                 | 242 | 71% (66%-76%)           | 66% (60%-72%)     | 72% (65%-78%)        | 63% (57%-69%)    |
| 6 months                                                                                 | 217 | 89% (76%-101%)          | 77% (71%-83%)     | 81% (75%-87%)        | 77% (72%-82%)    |
| 12 months                                                                                | 187 | 87% (82%-91%)           | 86% (80%-91%)     | 85% (78%-92%)        | 80% (74%-87%)    |
| <b>Extension, injured wrist as a percentage of uninjured wrist, mean (95% CI)</b>        |     |                         |                   |                      |                  |
| 6 weeks                                                                                  | 211 | 57% (50%-64%)           | 27% (17%-37%)     | 32% (23%-41%)        | 50% (43%-56%)    |
| 3 months                                                                                 | 243 | 83% (72%-94%)           | 70% (63%-77%)     | 72% (67%-78%)        | 77% (72%-83%)    |
| 6 months                                                                                 | 218 | 89% (84%-94%)           | 90% (80%-99%)     | 81% (76%-86%)        | 91% (80%-103%)   |
| 12 months                                                                                | 187 | 96% (90%-102%)          | 87% (81%-92%)     | 90% (85%-95%)        | 97% (90%-103%)   |
| <b>Radial deviation, injured wrist as a percentage of uninjured wrist, mean (95% CI)</b> |     |                         |                   |                      |                  |
| 6 weeks                                                                                  | 211 | 61% (53%-70%)           | 30% (18%-43%)     | 47% (37%-57%)        | 64% (52%-76%)    |
| 3 months                                                                                 | 241 | 93% (73%-113%)          | 74% (63%-84%)     | 69% (61%-78%)        | 85% (75%-95%)    |
| 6 months                                                                                 | 219 | 93% (84%-101%)          | 96% (85%-107%)    | 84% (74%-95%)        | 100% (90%-111%)  |
| 12 months                                                                                | 188 | 92% (82%-102%)          | 100% (88%-113%)   | 89% (77%-101%)       | 115% (102%-129%) |
| <b>Ulnar deviation, injured wrist as a percentage of uninjured wrist, mean (95% CI)</b>  |     |                         |                   |                      |                  |
| 6 weeks                                                                                  | 211 | 67% (58%-76%)           | 42% (29%-54%)     | 45% (35%-55%)        | 61% (50%-72%)    |
| 3 months                                                                                 | 242 | 83% (72%-93%)           | 66% (58%-74%)     | 79% (70%-88%)        | 75% (67%-83%)    |
| 6 months                                                                                 | 219 | 86% (81%-91%)           | 83% (75%-91%)     | 91% (83%-100%)       | 81% (74%-88%)    |
| 12 months                                                                                | 188 | 91% (84%-99%)           | 84% (79%-90%)     | 92% (82%-101%)       | 89% (69%-108%)   |
| <b>Pronation, injured wrist as a percentage of uninjured wrist, mean (95% CI)</b>        |     |                         |                   |                      |                  |
| 6 weeks                                                                                  | 211 | 88% (82%-94%)           | 78% (65%-91%)     | 83% (73%-93%)        | 87% (80%-93%)    |
| 3 months                                                                                 | 242 | 98% (96%-100%)          | 94% (90%-97%)     | 97% (94%-99%)        | 92% (88%-96%)    |
| 6 months                                                                                 | 218 | 100% (98%-103%)         | 98% (96%-100%)    | 98% (97%-100%)       | 95% (91%-98%)    |
| 12 months                                                                                | 187 | 99% (98%-100%)          | 96% (94%-98%)     | 99% (98%-100%)       | 96% (92%-100%)   |

eTable 3. Primary and secondary outcomes by study arm and assessment time (continued)

|                                                                                    | n   | Randomized Participants |                   |                      |                |
|------------------------------------------------------------------------------------|-----|-------------------------|-------------------|----------------------|----------------|
|                                                                                    |     | VLPS                    | External Fixation | Percutaneous Pinning | Casting        |
| <b>Supination, injured wrist as a percentage of uninjured wrist, mean (95% CI)</b> |     |                         |                   |                      |                |
| 6 weeks                                                                            | 211 | 82% (71%-92%)           | 64% (50%-78%)     | 61% (49%-72%)        | 73% (64%-82%)  |
| 3 months                                                                           | 242 | 95% (86%-103%)          | 79% (73%-86%)     | 81% (74%-87%)        | 81% (76%-86%)  |
| 6 months                                                                           | 219 | 94% (89%-100%)          | 93% (88%-97%)     | 90% (85%-95%)        | 89% (85%-93%)  |
| 12 months                                                                          | 188 | 99% (93%-105%)          | 94% (90%-99%)     | 100% (94%-106%)      | 93% (88%-97%)  |
| <b>Volar/dorsal tilt, degrees, mean (95% CI)<sup>f</sup></b>                       |     |                         |                   |                      |                |
| enrollment                                                                         | 249 | -19 (-23— -5)           | -11 (-15— -8)     | -13 (-16— -9)        | -9 (-12— -7)   |
| 2 weeks                                                                            | 233 | 5 (3-6)                 | -1 (-4-4)         | 1 (-2-3)             | -12 (-14— -8)  |
| 6 weeks                                                                            | 239 | 5 (3-7)                 | -1 (-3— -2)       | 1 (-1-4)             | -12 (-15— -9)  |
| 3 months                                                                           | 206 | 6 (3-8)                 | 0 (-3-3)          | 1 (-2-4)             | -10 (-14— -6)  |
| 6 months                                                                           | 175 | 5 (3-7)                 | -3 (-6-0)         | 3 (1-6)              | -9 (-13— -5)   |
| 12 months                                                                          | 137 | 3 (0-6)                 | -1 (-5-2)         | 2 (-1-4)             | -11 (-16— -7)  |
| <b>Ulnar variance, mm, mean (95% CI)</b>                                           |     |                         |                   |                      |                |
| enrollment                                                                         | 242 | 2.9 (2.2, 3.7)          | 2.0 (1.2, 2.8)    | 2.1 (1.3, 2.9)       | 2.3 (1.7, 2.9) |
| 2 weeks                                                                            | 230 | 0.6 (-0.1, 1.3)         | 1.8 (1.3, 2.4)    | 1.7 (1.1, 2.2)       | 3.3 (2.5, 4.0) |
| 6 weeks                                                                            | 237 | 1.3 (0.4, 2.2)          | 2.0 (1.4, 2.6)    | 2.8 (2.2, 3.4)       | 3.6 (2.8, 4.4) |
| 3 months                                                                           | 202 | 1.0 (0.4-1.5)           | 2.1 (1.6-3.2)     | 2.5 (1.9-3.0)        | 3.7 (2.9-4.6)  |
| 6 months                                                                           | 176 | 1.3 (0.4-2.2)           | 2.0 (1.4-2.6)     | 2.8 (2.2-3.4)        | 3.6 (2.8-4.4)  |
| 12 months                                                                          | 135 | 1.4 (0.7, 2.0)          | 3.2 (1.6, 4.8)    | 2.1 (1.6, 2.7)       | 2.9 (2.1, 3.8) |
| <b>Radial inclination, degrees, mean (95% CI)</b>                                  |     |                         |                   |                      |                |
| enrollment                                                                         | 251 | 16 (14-17)              | 16 (14-18)        | 16 (15-18)           | 17 (15-18)     |
| 2 weeks                                                                            | 235 | 21 (19-22)              | 21 (19-22)        | 23 (20-23)           | 14 (14-17)     |
| 6 weeks                                                                            | 243 | 22 (20-23)              | 20 (19-21)        | 22 (21-24)           | 15 (14-17)     |
| 3 months                                                                           | 207 | 23 (21-24)              | 20 (18-21)        | 22 (20-23)           | 15 (13-17)     |
| 6 months                                                                           | 182 | 23 (21-25)              | 21 (19-23)        | 21 (19-22)           | 16 (14-17)     |
| 12 months                                                                          | 139 | 22 (20-23)              | 20 (18-21)        | 21 (19-23)           | 17 (15-20)     |

**eTable 3. Primary and secondary outcomes by study arm and assessment time (continued)**

|                                         | n   | Randomized Participants |                   |                      |                 |
|-----------------------------------------|-----|-------------------------|-------------------|----------------------|-----------------|
|                                         |     | VLPS                    | External Fixation | Percutaneous Pinning | Casting         |
| <b>Radial height, mm, mean (95% CI)</b> |     |                         |                   |                      |                 |
| enrollment                              | 242 | 8.1 (7.3, 8.9)          | 8.5 (7.2, 9.8)    | 8.3 (7.5, 9.0)       | 8.8 (8.1, 9.5)  |
| 2 weeks                                 | 230 | 10.8 (10.0, 11.5)       | 10.4 (9.5, 11.4)  | 10.9 (10.1, 11.7)    | 7.9 (7.2, 8.7)  |
| 6 weeks                                 | 235 | 11.4 (10.5, 12.3)       | 10.4 (9.4, 11.4)  | 10.1 (9.1, 11.0)     | 8.5 (7.5, 9.4)  |
| 3 months                                | 202 | 11.2 (10.6-12.1)        | 9.7 (8.8-10.7)    | 10.8 (9.9-11.7)      | 7.7 (6.9-8.6)   |
| 6 months                                | 183 | 11.4 (10.5-12.3)        | 10.4 (9.4-11.4)   | 10.1 (9.1-11.0)      | 8.5 (7.5-9.4)   |
| 12 months                               | 135 | 11.1 (10.1, 12.1)       | 9.8 (8.9, 10.8)   | 10.8 (9.8, 11.8)     | 9.1 (7.9, 10.4) |
