# Supplementary material
Source: PubMed Central journal article supplement (PMC7255928)
Supplement: NIHMS1551761-supplement-_6.pdf [file NIHMS1551761-supplement-_6.pdf]

**Table, Supplemental Digital Content 6. Non-parametric correlation between continuous variables and selected outcomes**

|                                         | 6-month MHQ Function |         | 6-month MHQ Satisfaction |         | 12-month MHQ Function |         | 12-month MHQ Satisfaction |         |
|-----------------------------------------|----------------------|---------|--------------------------|---------|-----------------------|---------|---------------------------|---------|
|                                         | $\rho$               | p-value | $\rho$                   | p-value | $\rho$                | p-value | $\rho$                    | p-value |
| <b>radial height at that visit</b>      | -0.07                | 0.33    | -0.06                    | 0.32    | -0.02                 | 0.82    | 0.08                      | 0.35    |
| <b>radial inclination at that visit</b> | -0.04                | 0.57    | -0.09                    | 0.21    | 0.03                  | 0.74    | 0.07                      | 0.44    |
| <b>volar/dorsal tilt at that visit</b>  | 0.04                 | 0.61    | 0.07                     | 0.39    | 0.14                  | 0.09    | 0.19                      | 0.03    |
| <b>ulnar variance at that visit</b>     | -0.02                | 0.81    | 0.08                     | 0.28    | -0.11                 | 0.19    | -0.01                     | 0.88    |
